# Supplementary material for: Theoretical study of the electronic structure of the complexes of gold, silver, and copper mono- and bimetallic nanoclusters decorated on graphitic carbon nitride (g-C3N4): DFT and TD-DFT studies of photocatalytic activity
Source: Royal Society of Chemistry journal article supplement (doi:10.1039/d3nj04497a), 2023-01-01
Supplement: d3nj04497a1.pdf [file d3nj04497a1.pdf]

## *Supporting information*

# Theoretical Study of the Electronic Structure of the Complexes of Gold, Silver, and Copper Mono- and Bimetallic Nanoclusters Decorated on Graphitic Carbon Nitride (g-C<sub>3</sub>N<sub>4</sub>): DFT and TD-DFT Study of Photocatalytic Activity

*Hanieh Moradi<sup>a</sup>, Hossein Farrokhpour\*<sup>a</sup>, Sayyed Mahdi Hosseini<sup>a</sup>, Mehran Ghiaci<sup>a</sup>*

<sup>a</sup>Department of Chemistry, Isfahan University of Technology, University Boulevard, Isfahan, 84156-83111, Iran

*\*Corresponding Author: Hossein Farrokhpour*

*E-mail: h-farrokh@cc.iut.ac.ir*

**Summary of content:** *This Supporting Information file contains 21 Figures presented in 21 pages.*

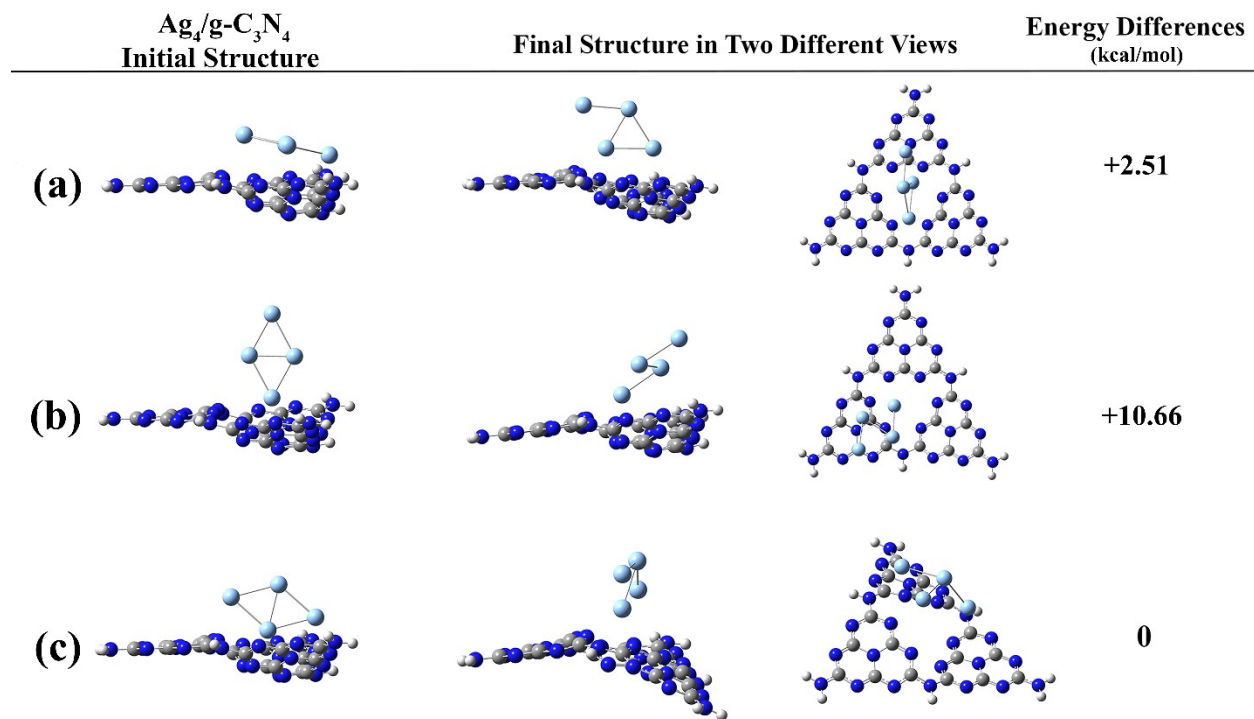

Fig. S1. The initial and optimized (two views) geometries of  $\text{Ag}_4/\text{g-C}_3\text{N}_4$  complexes and their energies relative to the most stable structure.

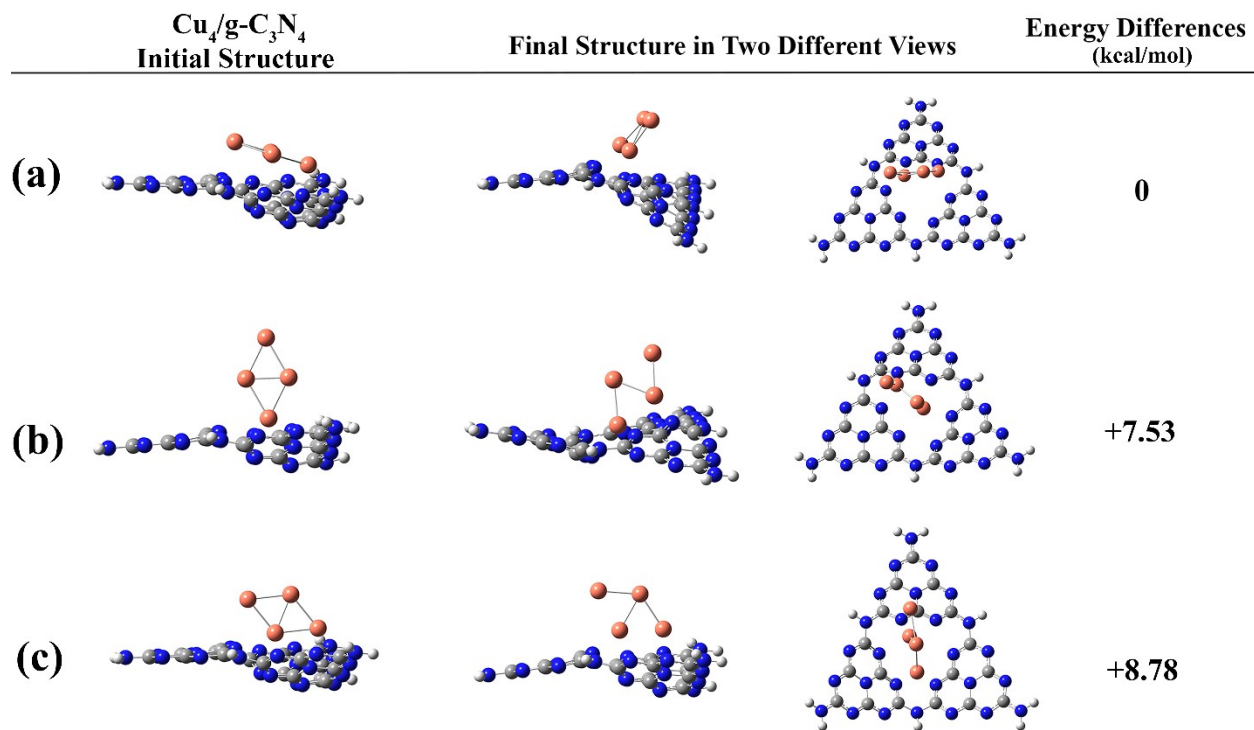

Fig. S2. The initial and optimized (two views) geometries of  $\text{Cu}_4/\text{g-C}_3\text{N}_4$  complexes and their energies relative to the most stable structure.

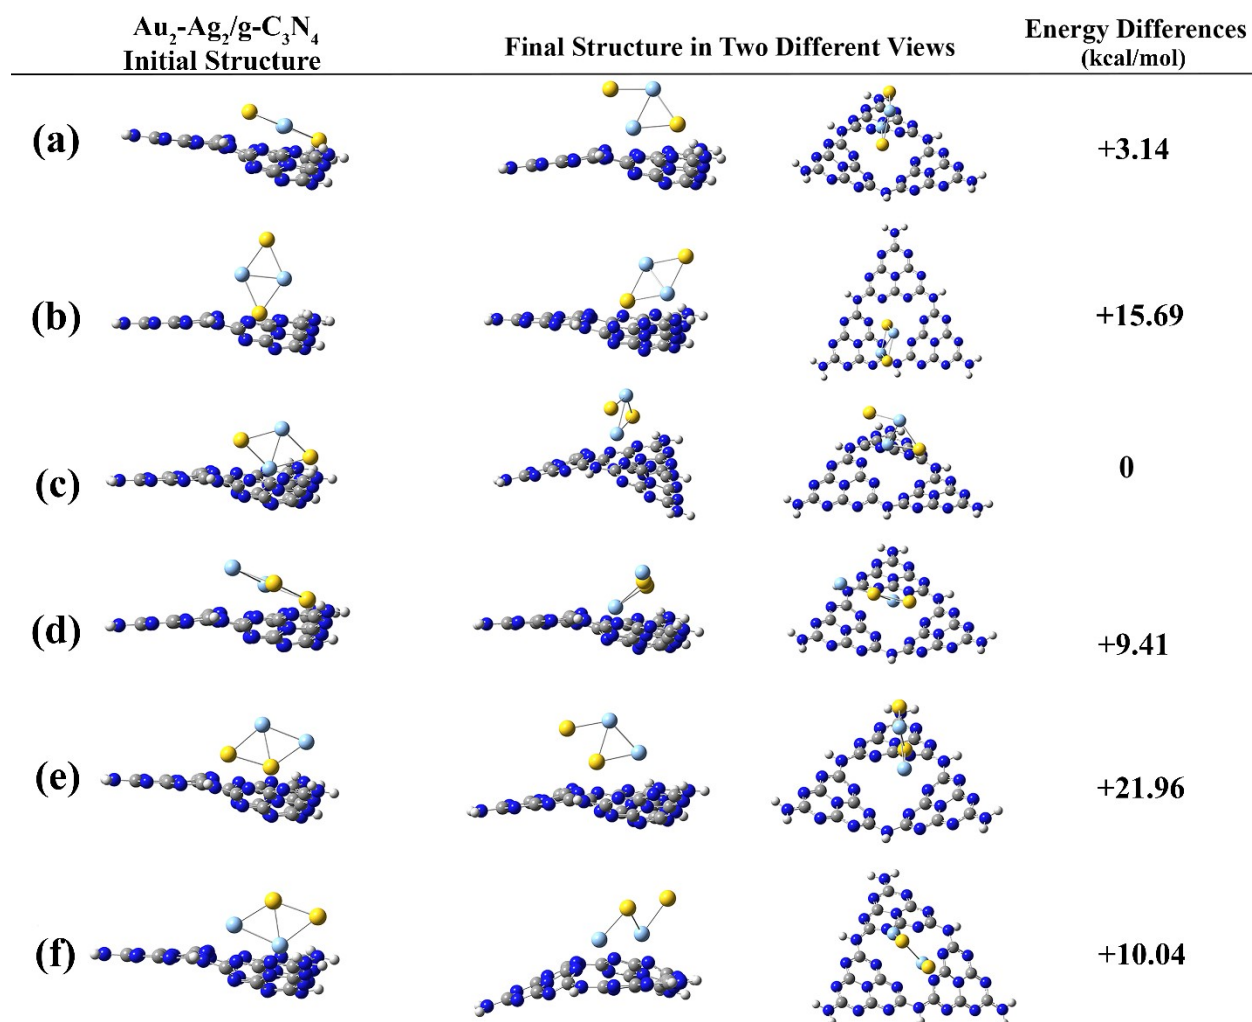

**Fig. S3.** The initial and optimized (two views) geometries of  $\text{Au}_2\text{-Ag}_2/\text{g-C}_3\text{N}_4$  complexes and their energies relative to the most stable structure.

|     | $\text{Au}_2\text{-Cu}_2/\text{g-C}_3\text{N}_4$<br>Initial Structure             | Final Structure in Two Different Views                                            |                                                                                    | Energy Differences<br>(kcal/mol) |
|-----|-----------------------------------------------------------------------------------|-----------------------------------------------------------------------------------|------------------------------------------------------------------------------------|----------------------------------|
| (a) | 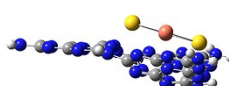 |  |  | 0                                |
| (b) |  |  |  | +4.39                            |
| (c) |  |  |  | +4.39                            |
| (d) |  |  |  | +35.76                           |
| (e) |  |  |  | +30.74                           |
| (f) |  |  |  | +3.76                            |

**Fig. S4.** The initial and optimized (two views) geometries of  $\text{Au}_2\text{-Cu}_2/\text{g-C}_3\text{N}_4$  complexes and their energies relative to the most stable structure.

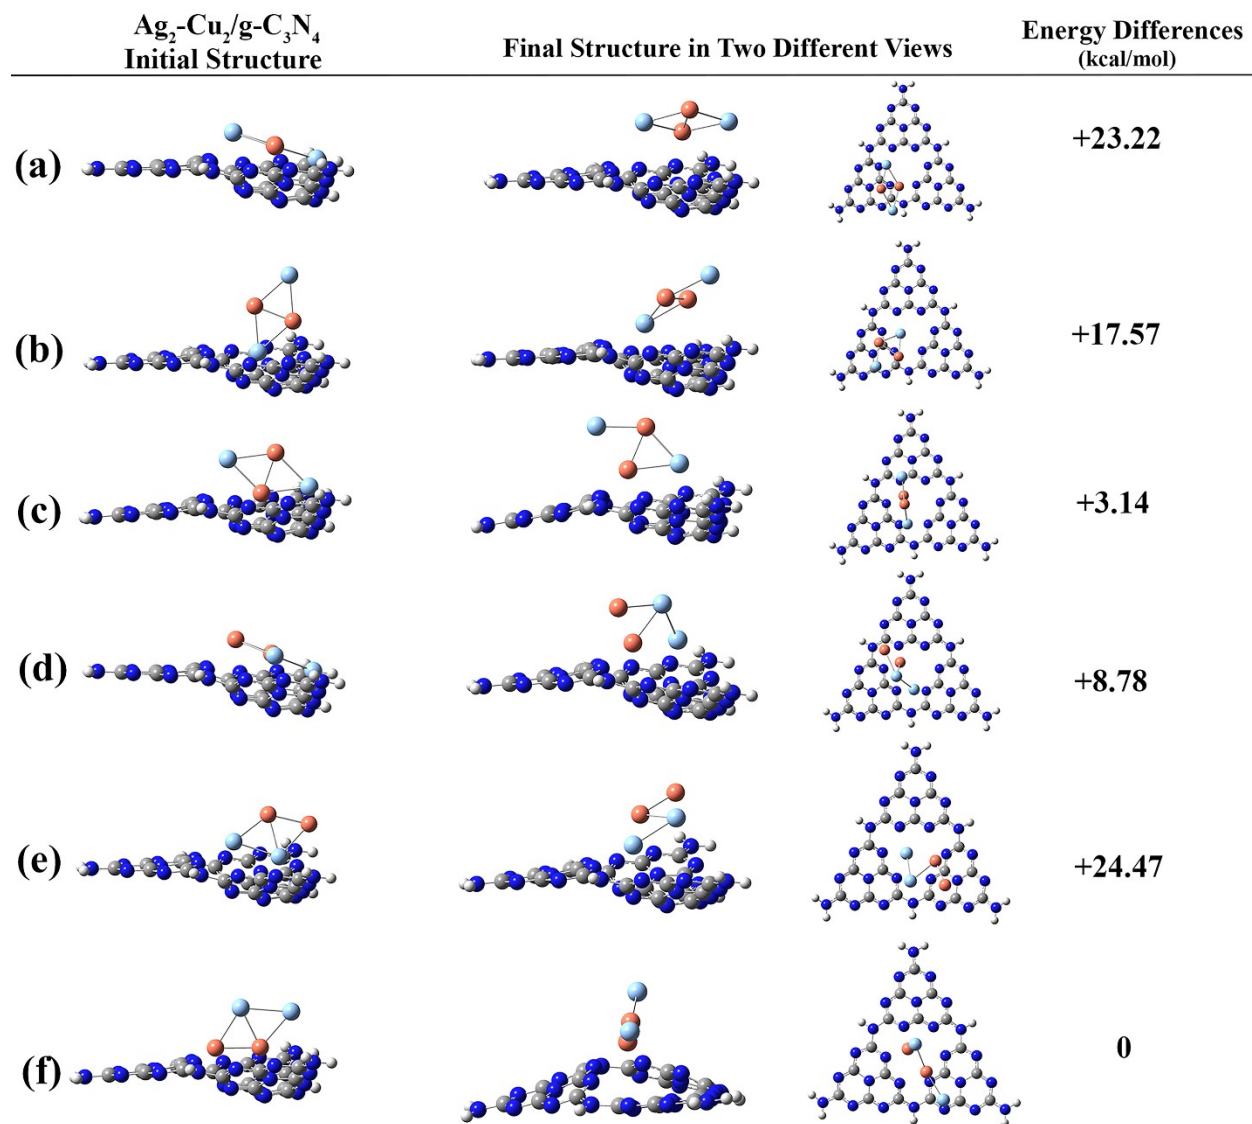

Fig. S5. The initial and optimized (two views) geometries of  $\text{Ag}_2\text{-Cu}_2/\text{g-C}_3\text{N}_4$  complexes and their energies relative to the most stable structure.

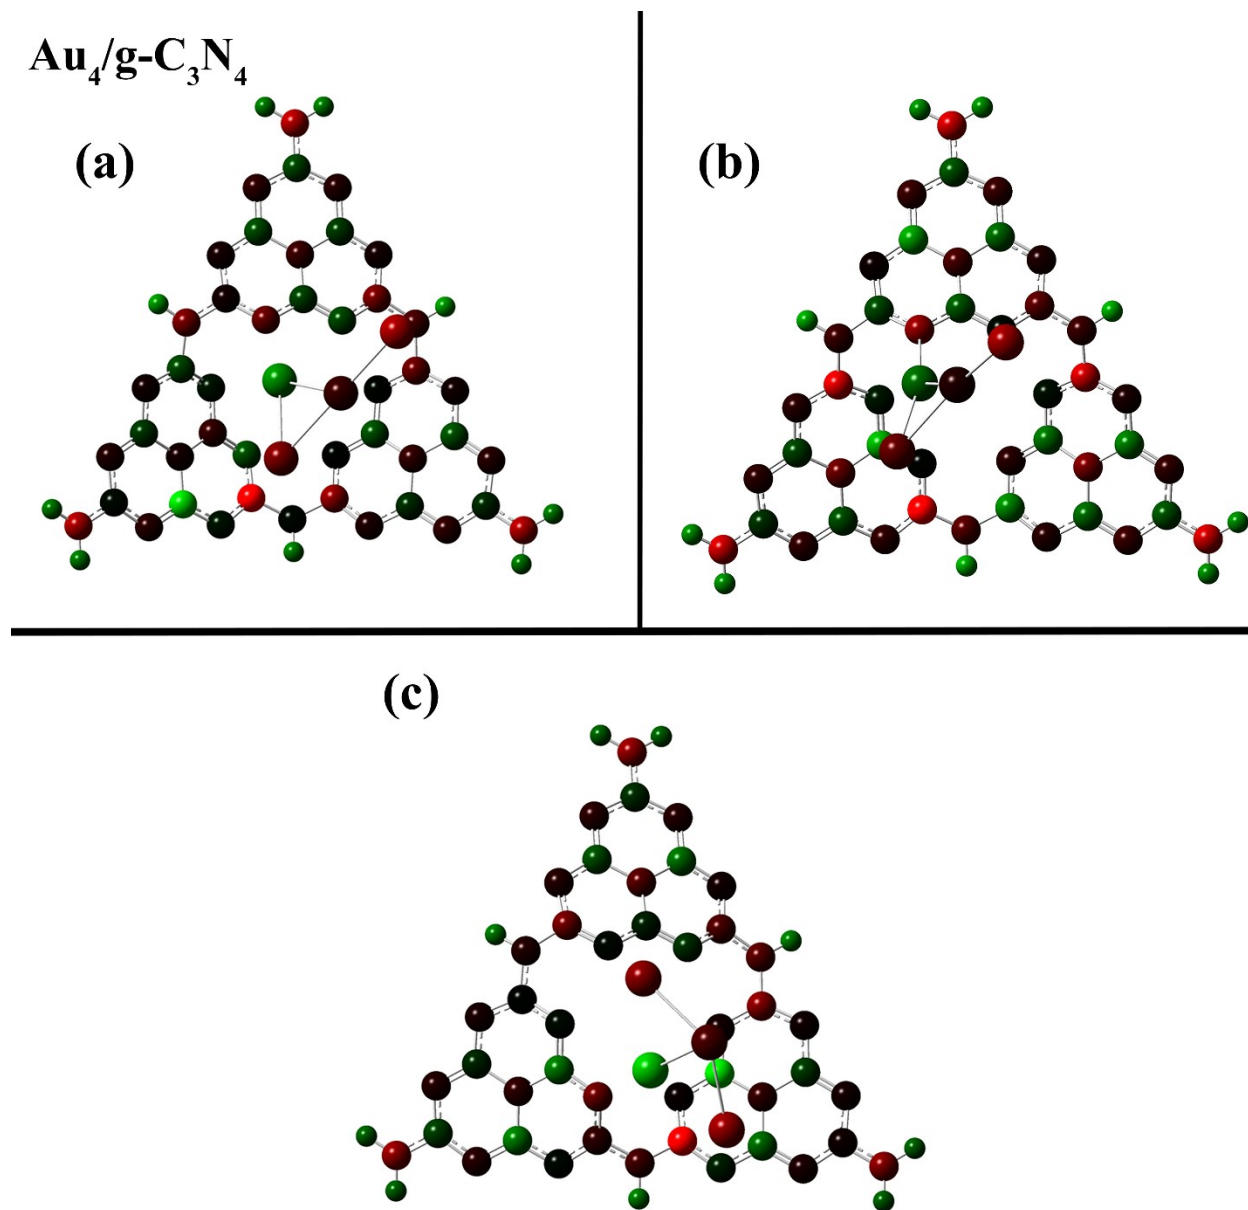

Fig. S6. The colored representation of the partial charges of three optimized  $\text{Au}_4/\text{g-C}_3\text{N}_4$  complexes.

$\text{Ag}_4/\text{g-C}_3\text{N}_4$

(a)

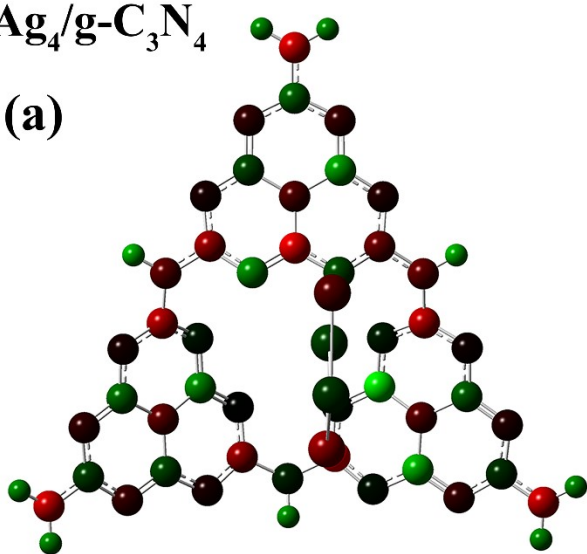

(b)

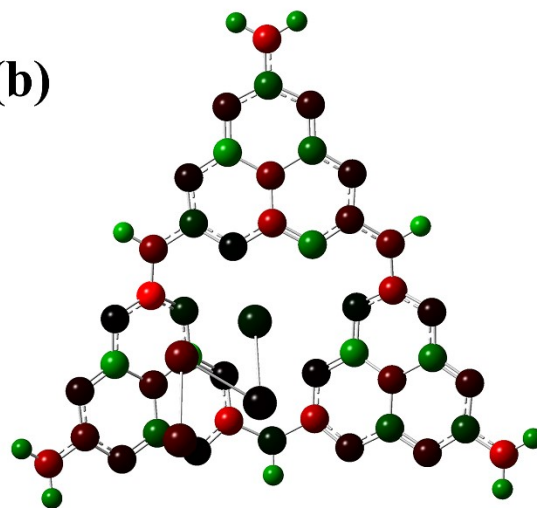

(c)

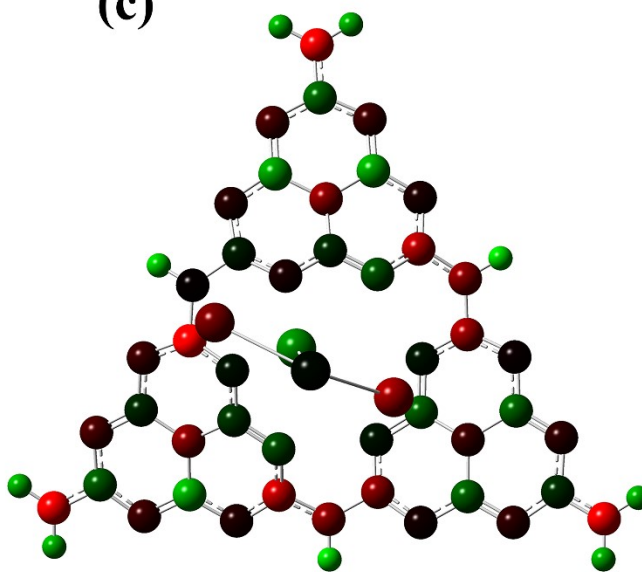

Fig. S7. The colored representation of the partial charges of three optimized  $\text{Ag}_4/\text{g-C}_3\text{N}_4$  complexes.



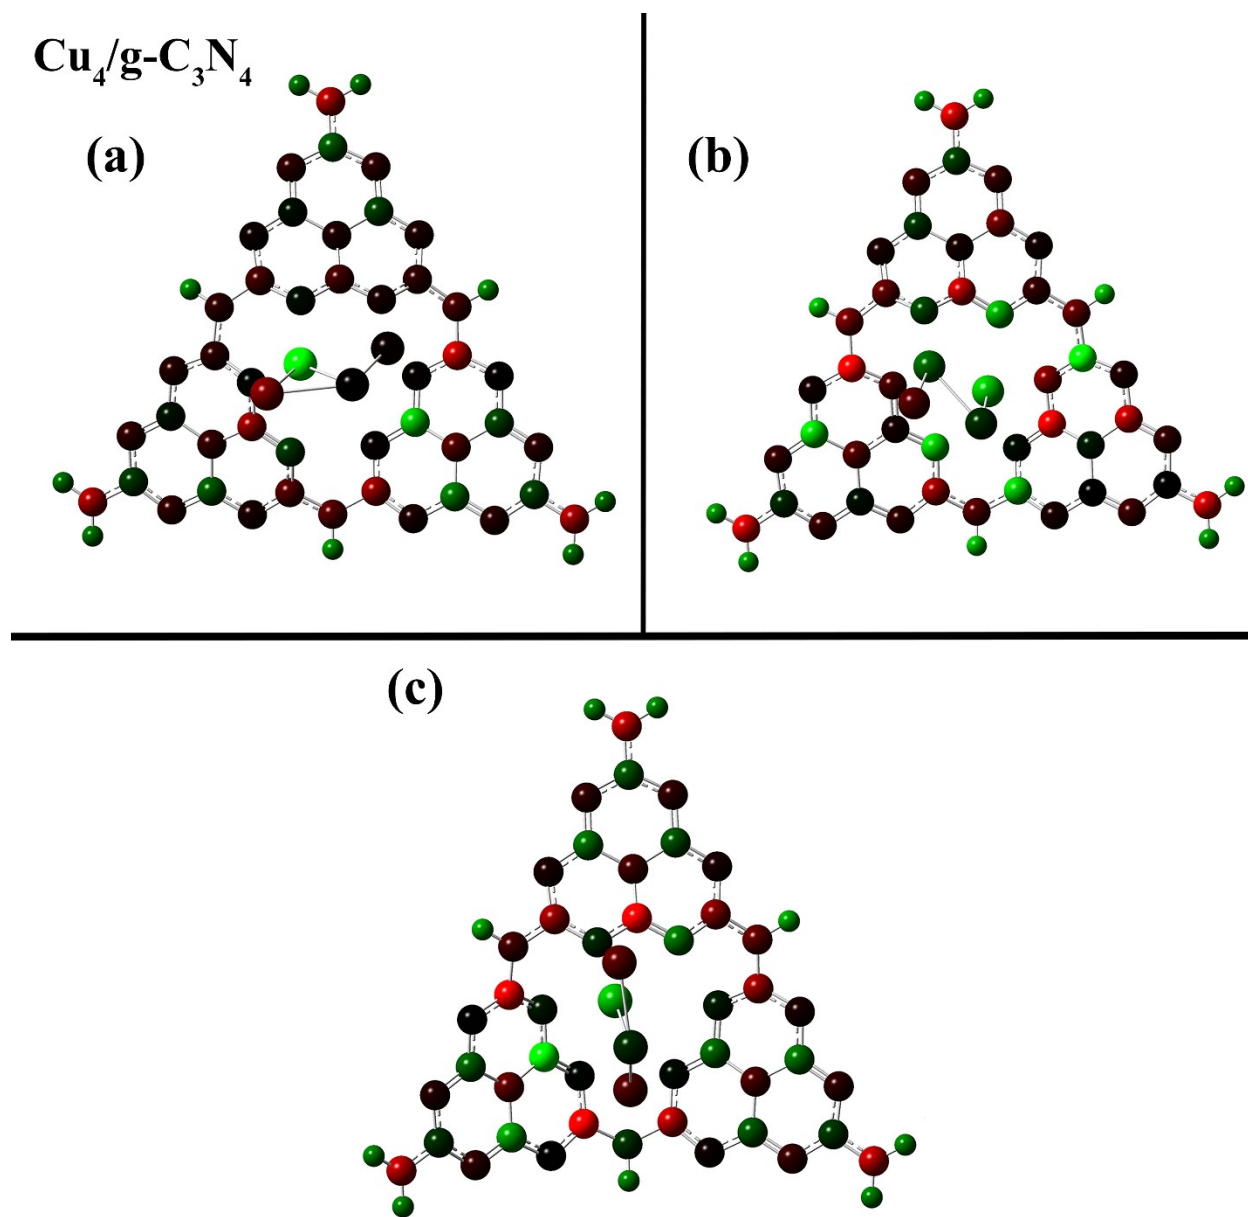

Fig. S8. The colored representation of the partial charges of three optimized  $\text{Cu}_4/\text{g-C}_3\text{N}_4$  complexes.



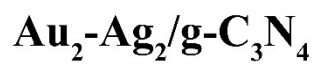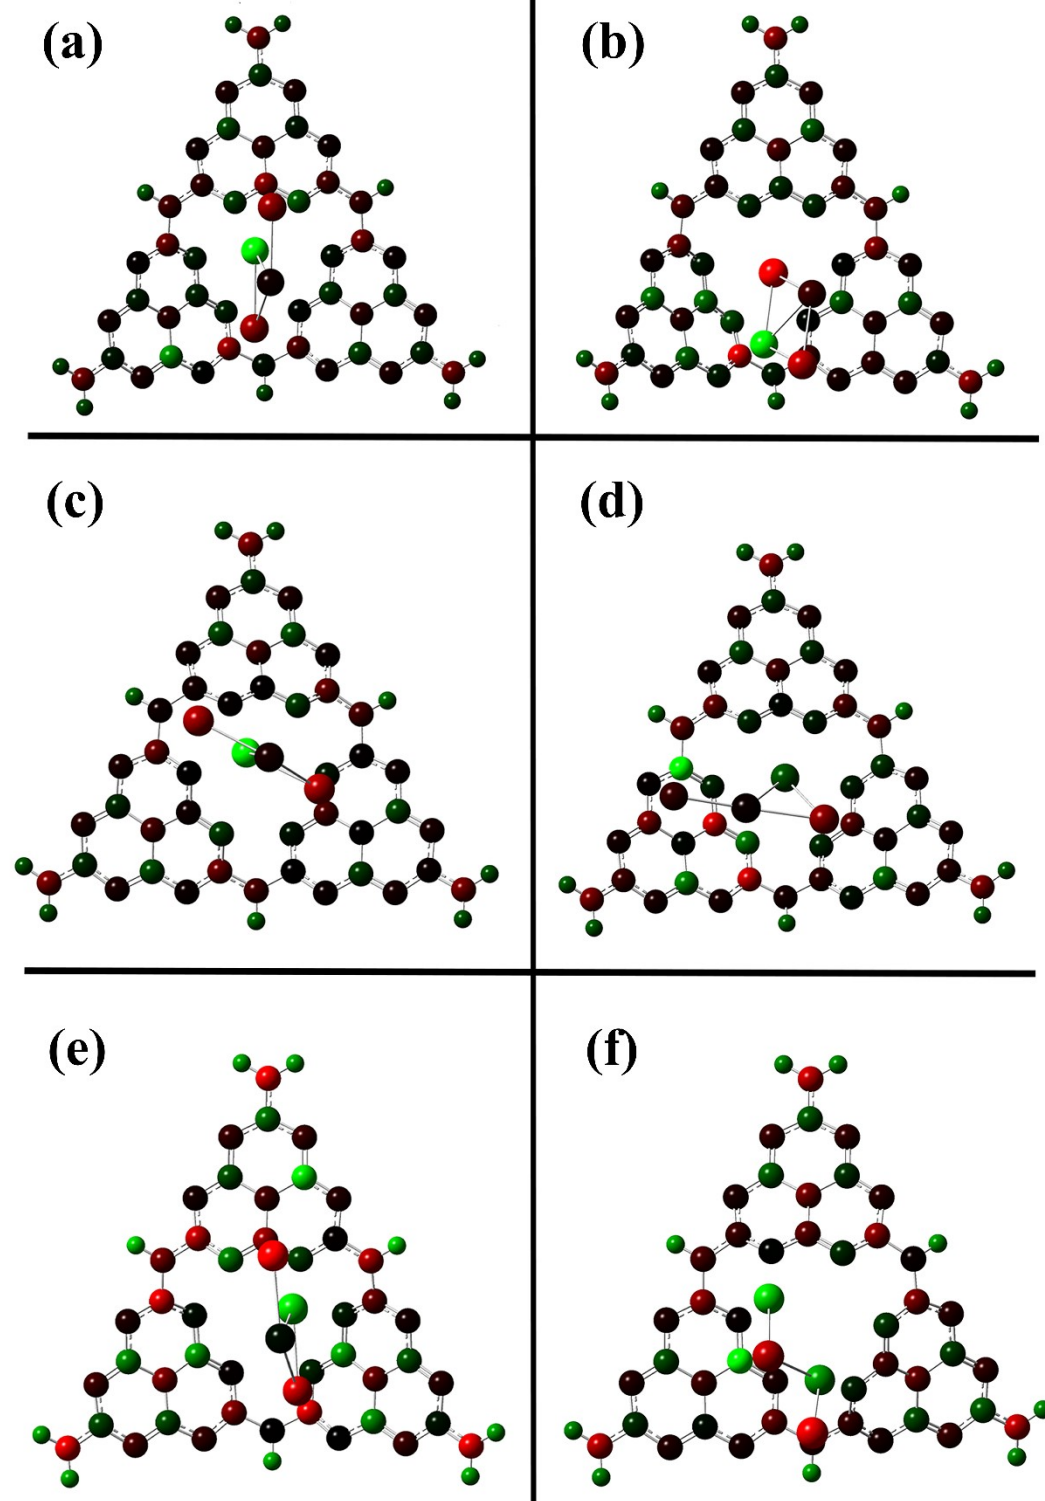

Fig. S9. The colored representation of the partial charges of six optimized  $\text{Au}_2\text{-Ag}_2/\text{g-C}_3\text{N}_4$  complexes.

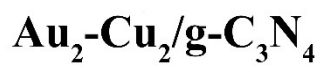

(a)

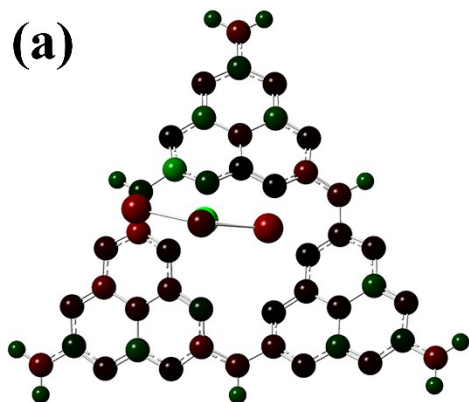

(b)

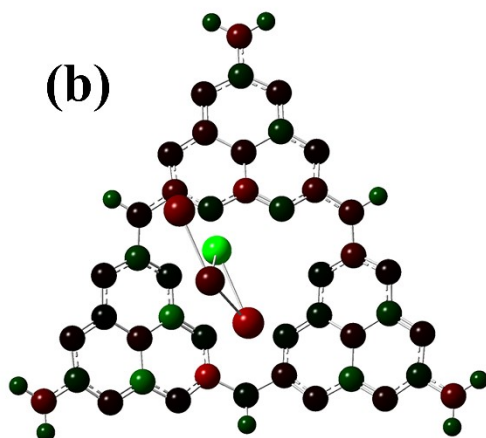

(c)

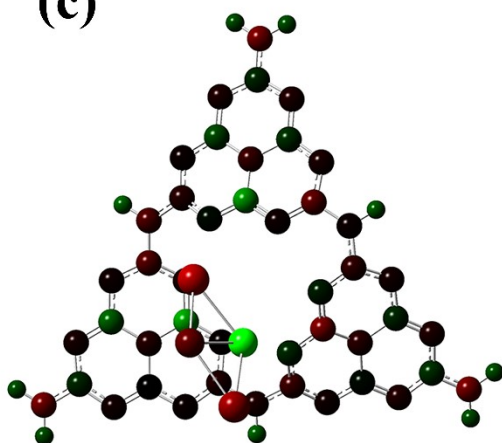

(d)

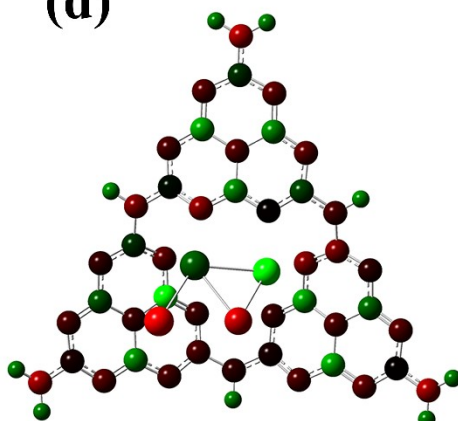

(e)

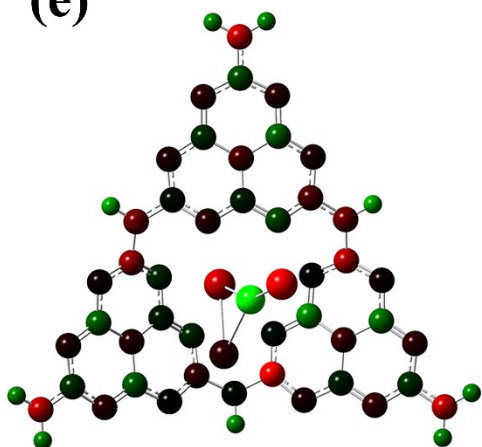

(f)

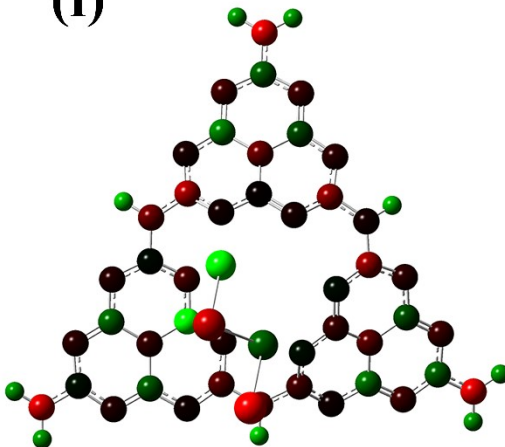

Fig. S10. The colored representation of the partial charges of six optimized Au<sub>2</sub>-Cu<sub>2</sub>/g-C<sub>3</sub>N<sub>4</sub> complexes.

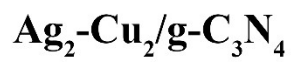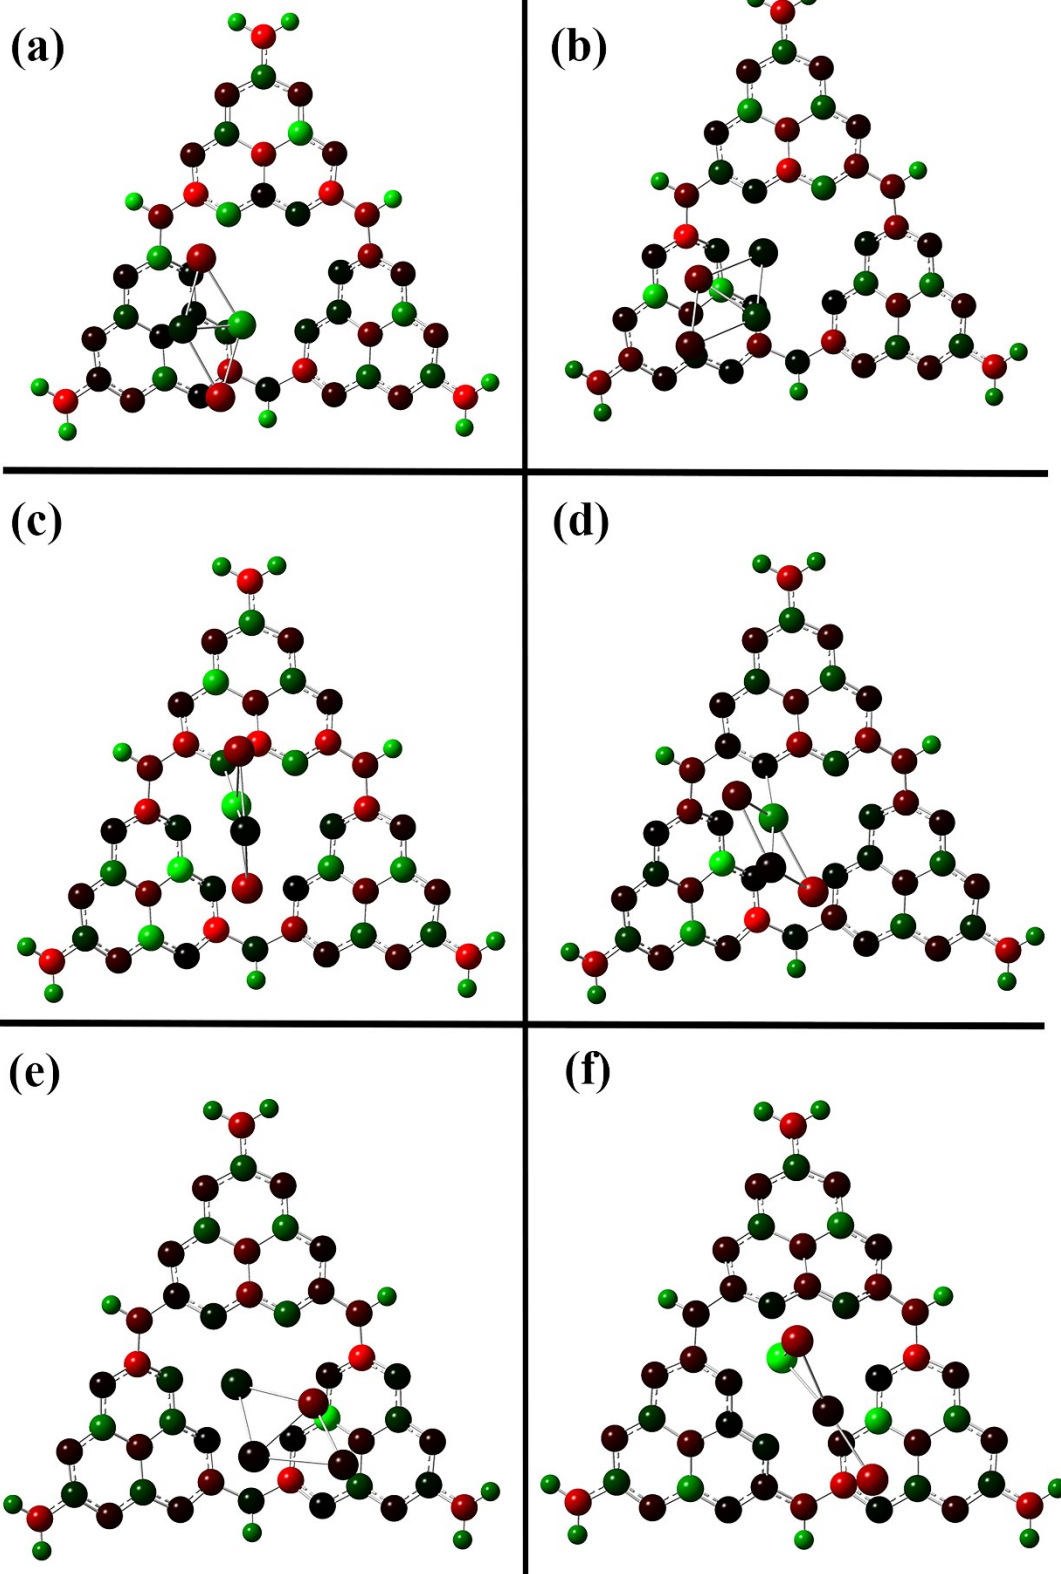

Fig. S11. The colored representation of the partial charges of six optimized  $\text{Ag}_2\text{-Cu}_2/\text{g-C}_3\text{N}_4$  complexes.

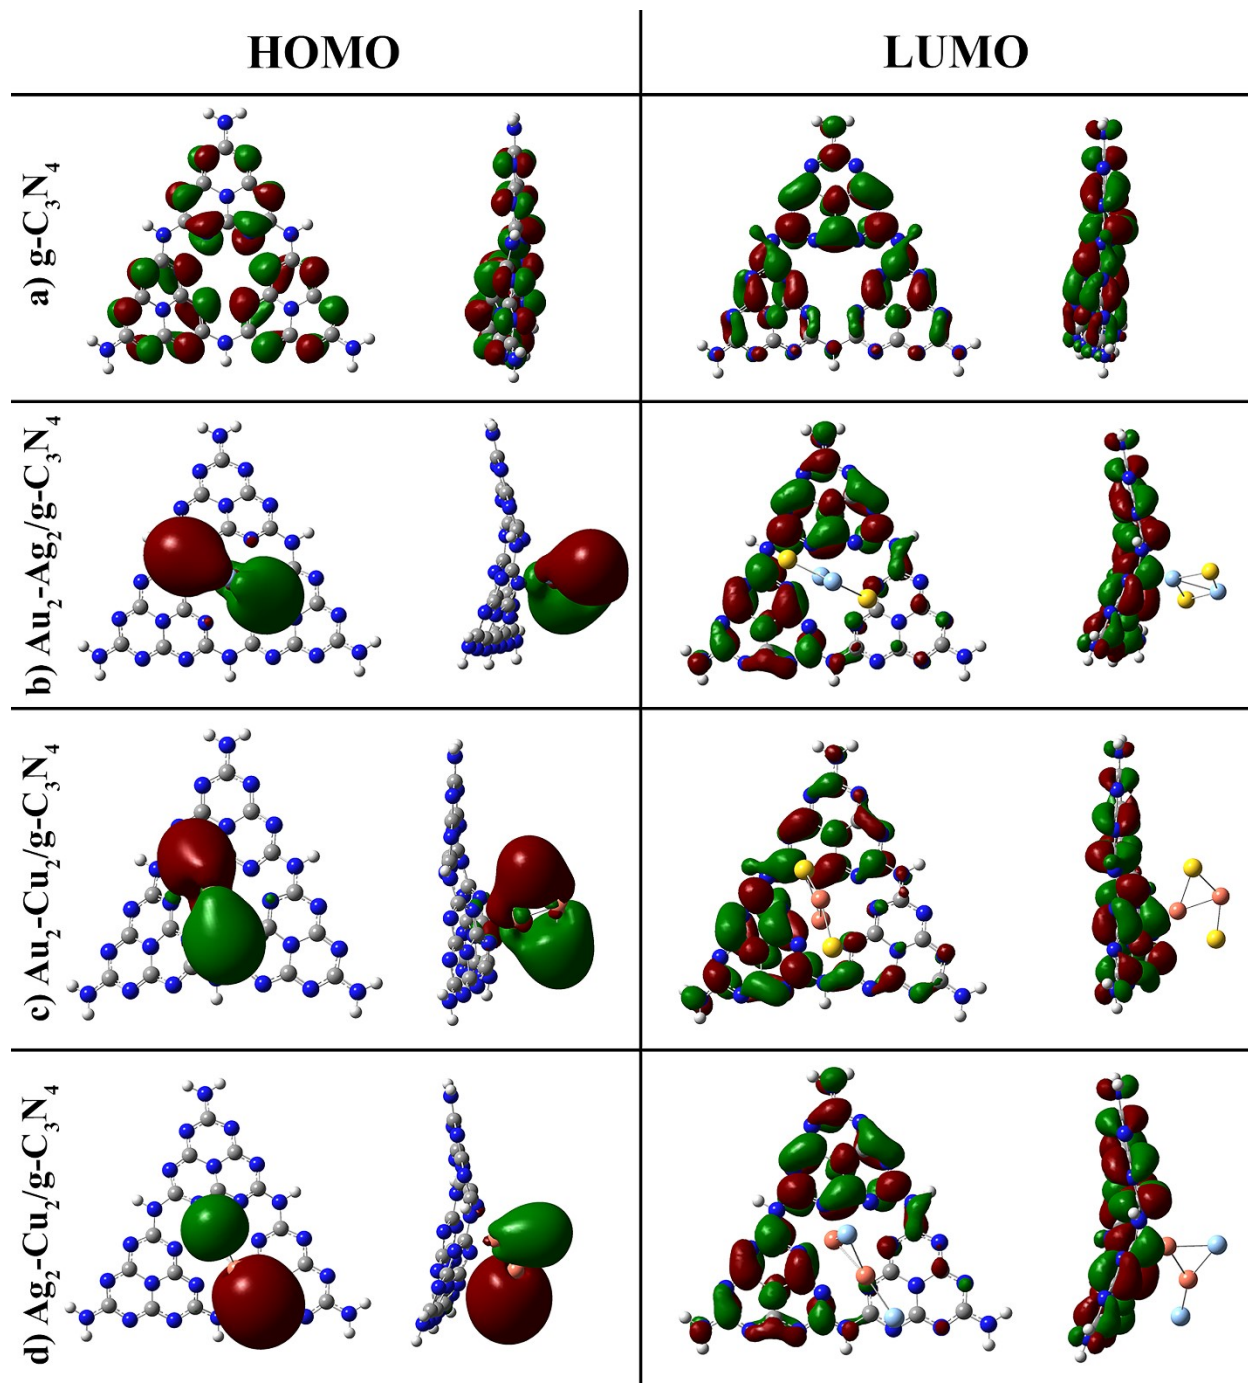

Fig. S12. Two views of the HOMO and LUMO of (a) the bare  $g\text{-C}_3\text{N}_4$  and the most stable (b)  $\text{Au}_2\text{-Ag}_2$ , (c)  $\text{Au}_2\text{-Cu}_2$ , and (d)  $\text{Ag}_2\text{-Cu}_2/g\text{-C}_3\text{N}_4$  complexes.



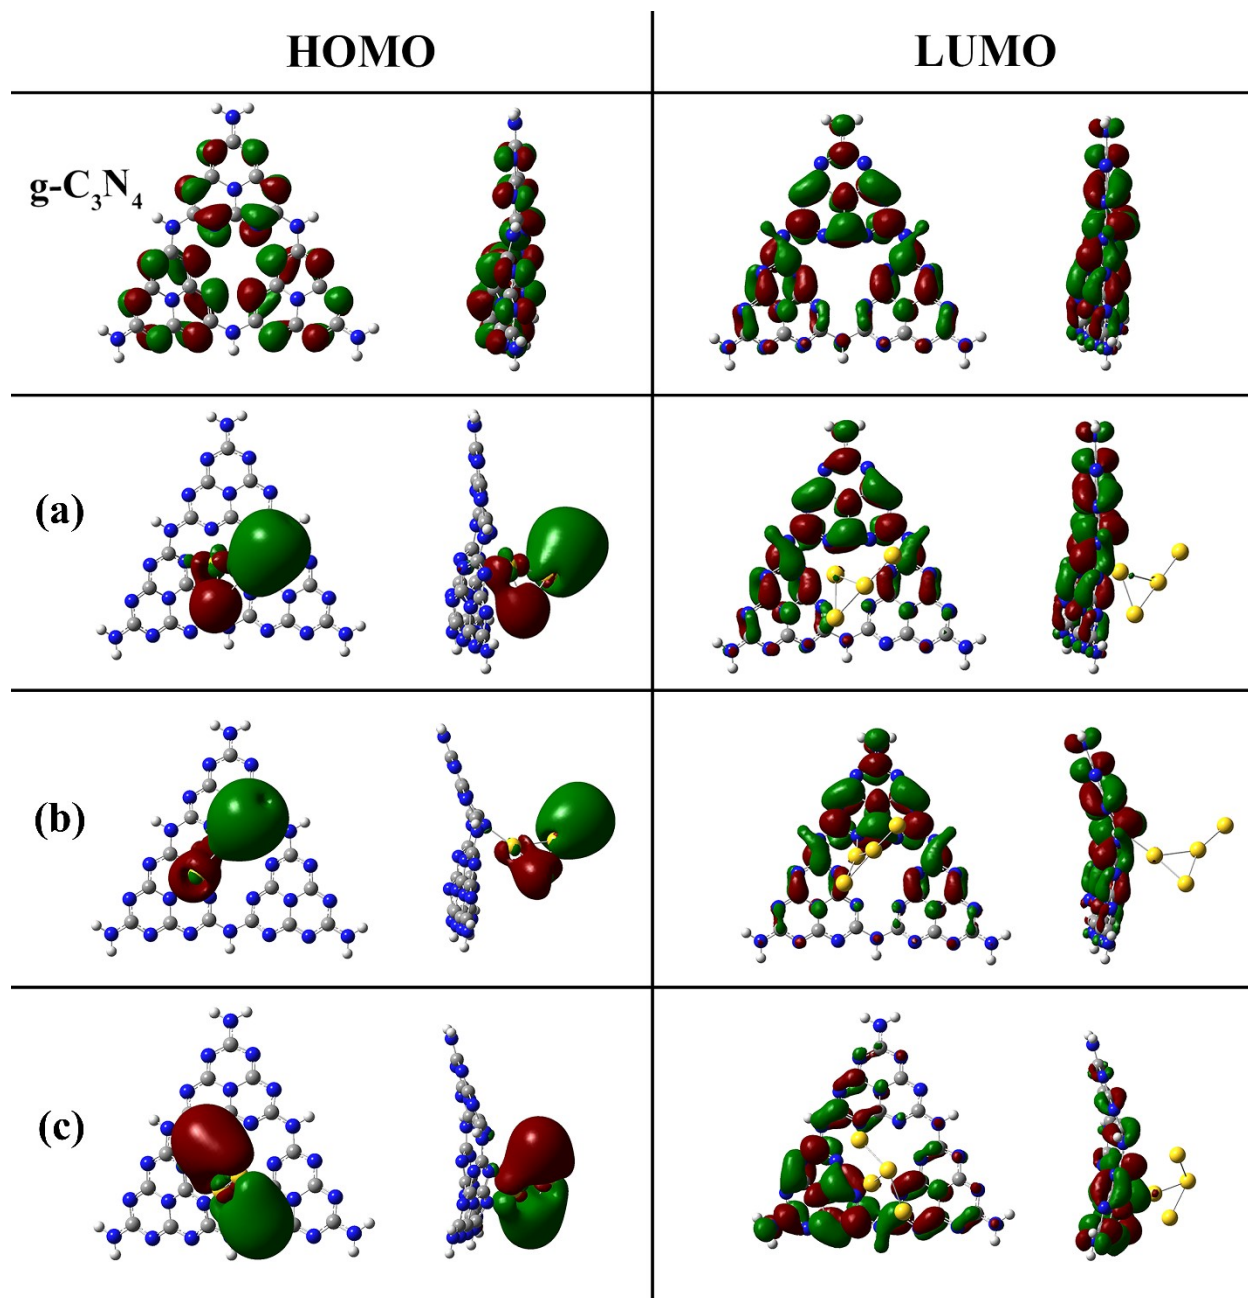

Fig. S13. Two views of the HOMO and LUMO for the bare  $g\text{-C}_3\text{N}_4$  and three optimized  $\text{Au}_4/g\text{-C}_3\text{N}_4$  complexes.

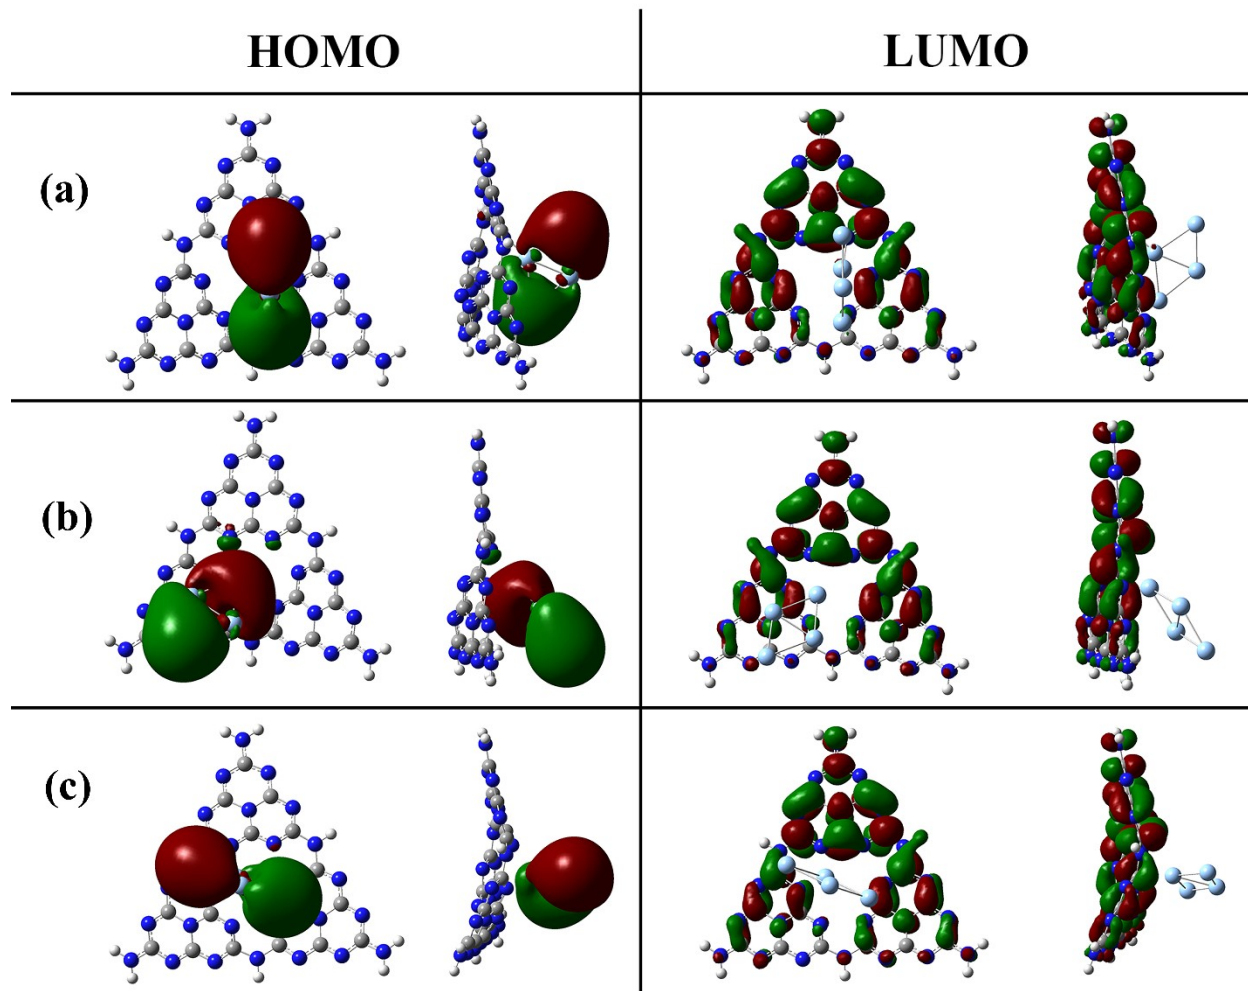

Fig. S14. Two views of the HOMO and LUMO for three optimized  $\text{Ag}_4/\text{g-C}_3\text{N}_4$  complexes.

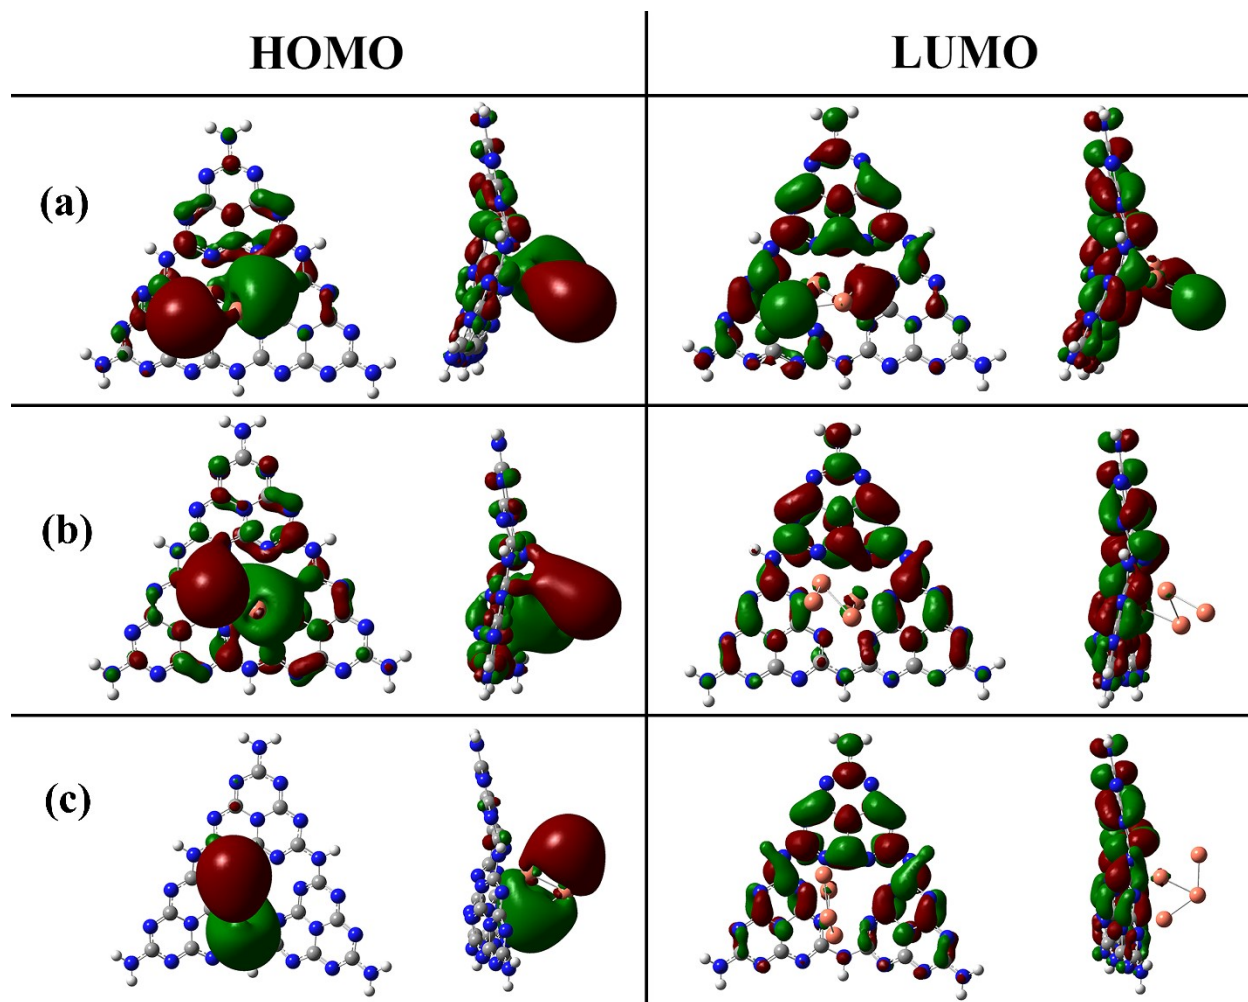

Fig. S15. Two views of the HOMO and LUMO for three optimized  $\text{Cu}_4/\text{g-C}_3\text{N}_4$  complexes.



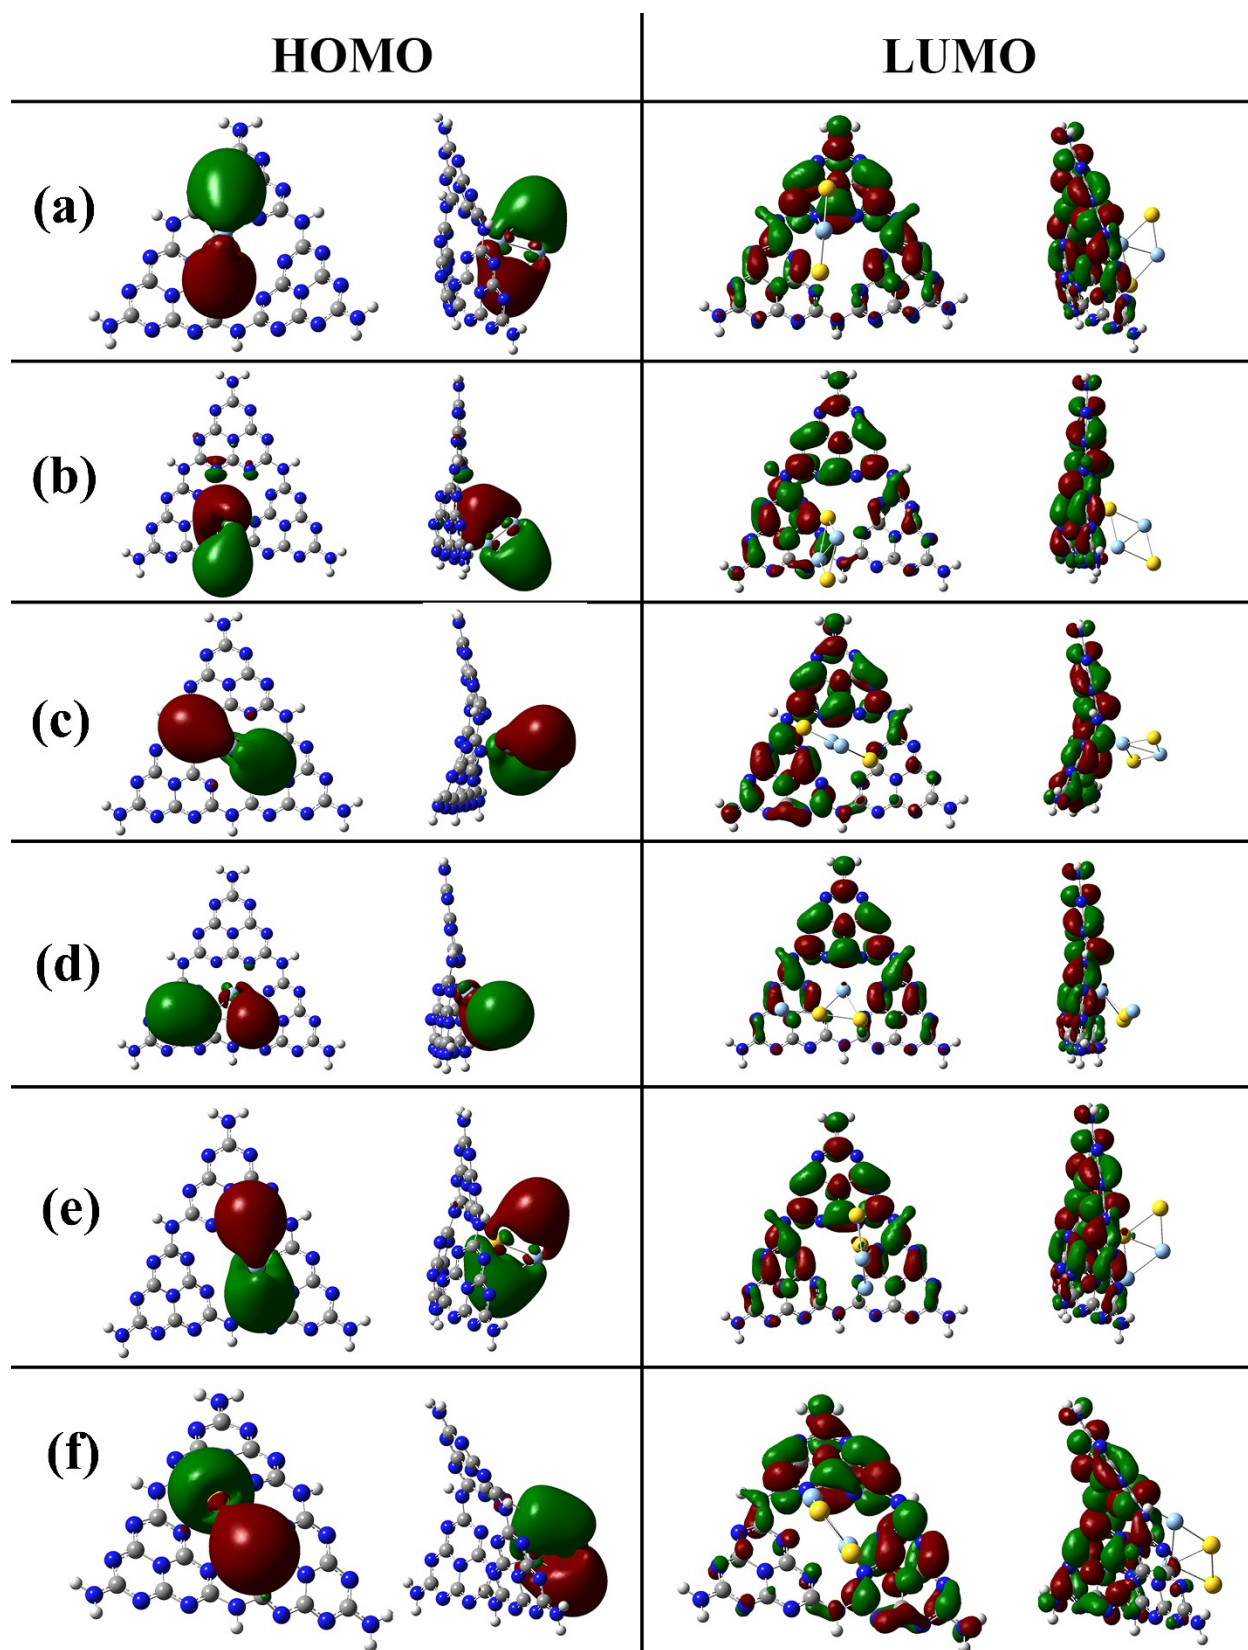

Fig. S16. Two views of the HOMO and LUMO for six optimized Au<sub>2</sub>-Ag<sub>2</sub>/g-C<sub>3</sub>N<sub>4</sub> complexes.

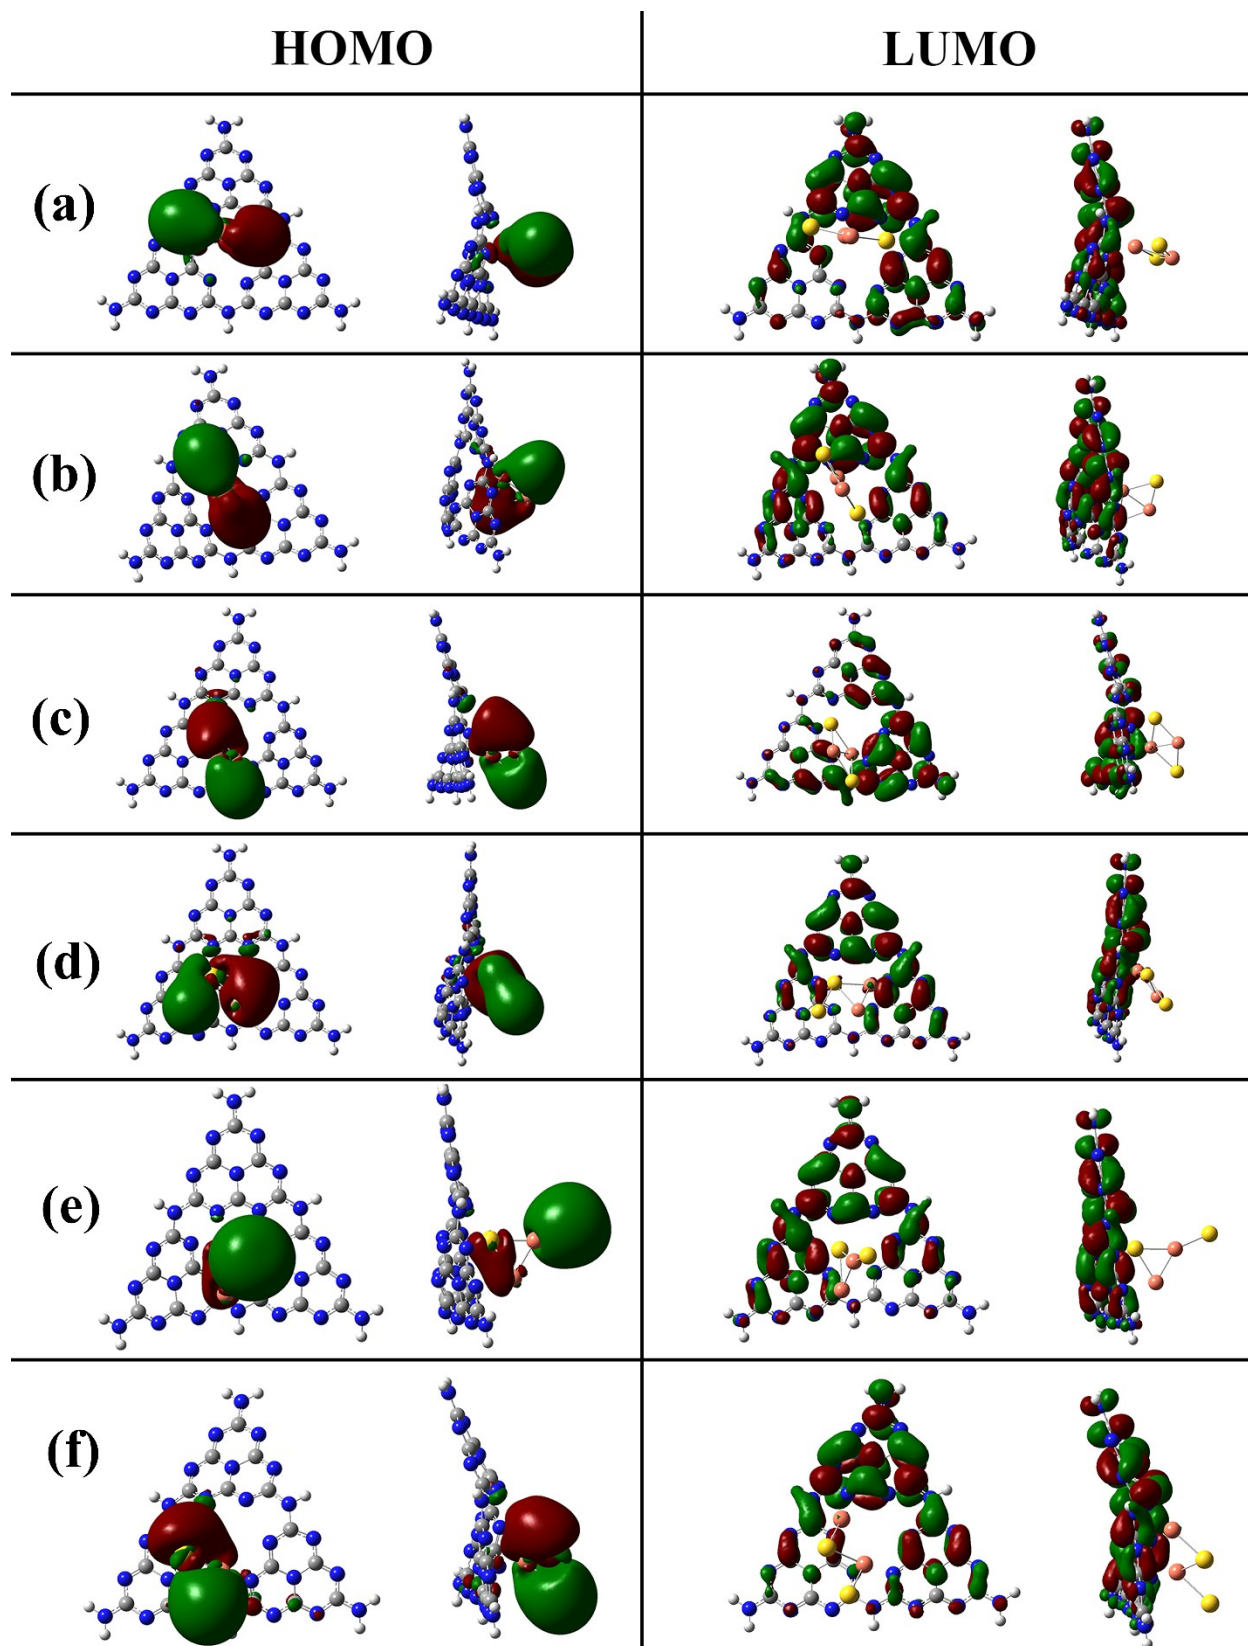

Fig. S17. Two views of the HOMO and LUMO for six optimized Au<sub>2</sub>-Cu<sub>2</sub>/g-C<sub>3</sub>N<sub>4</sub> complexes.

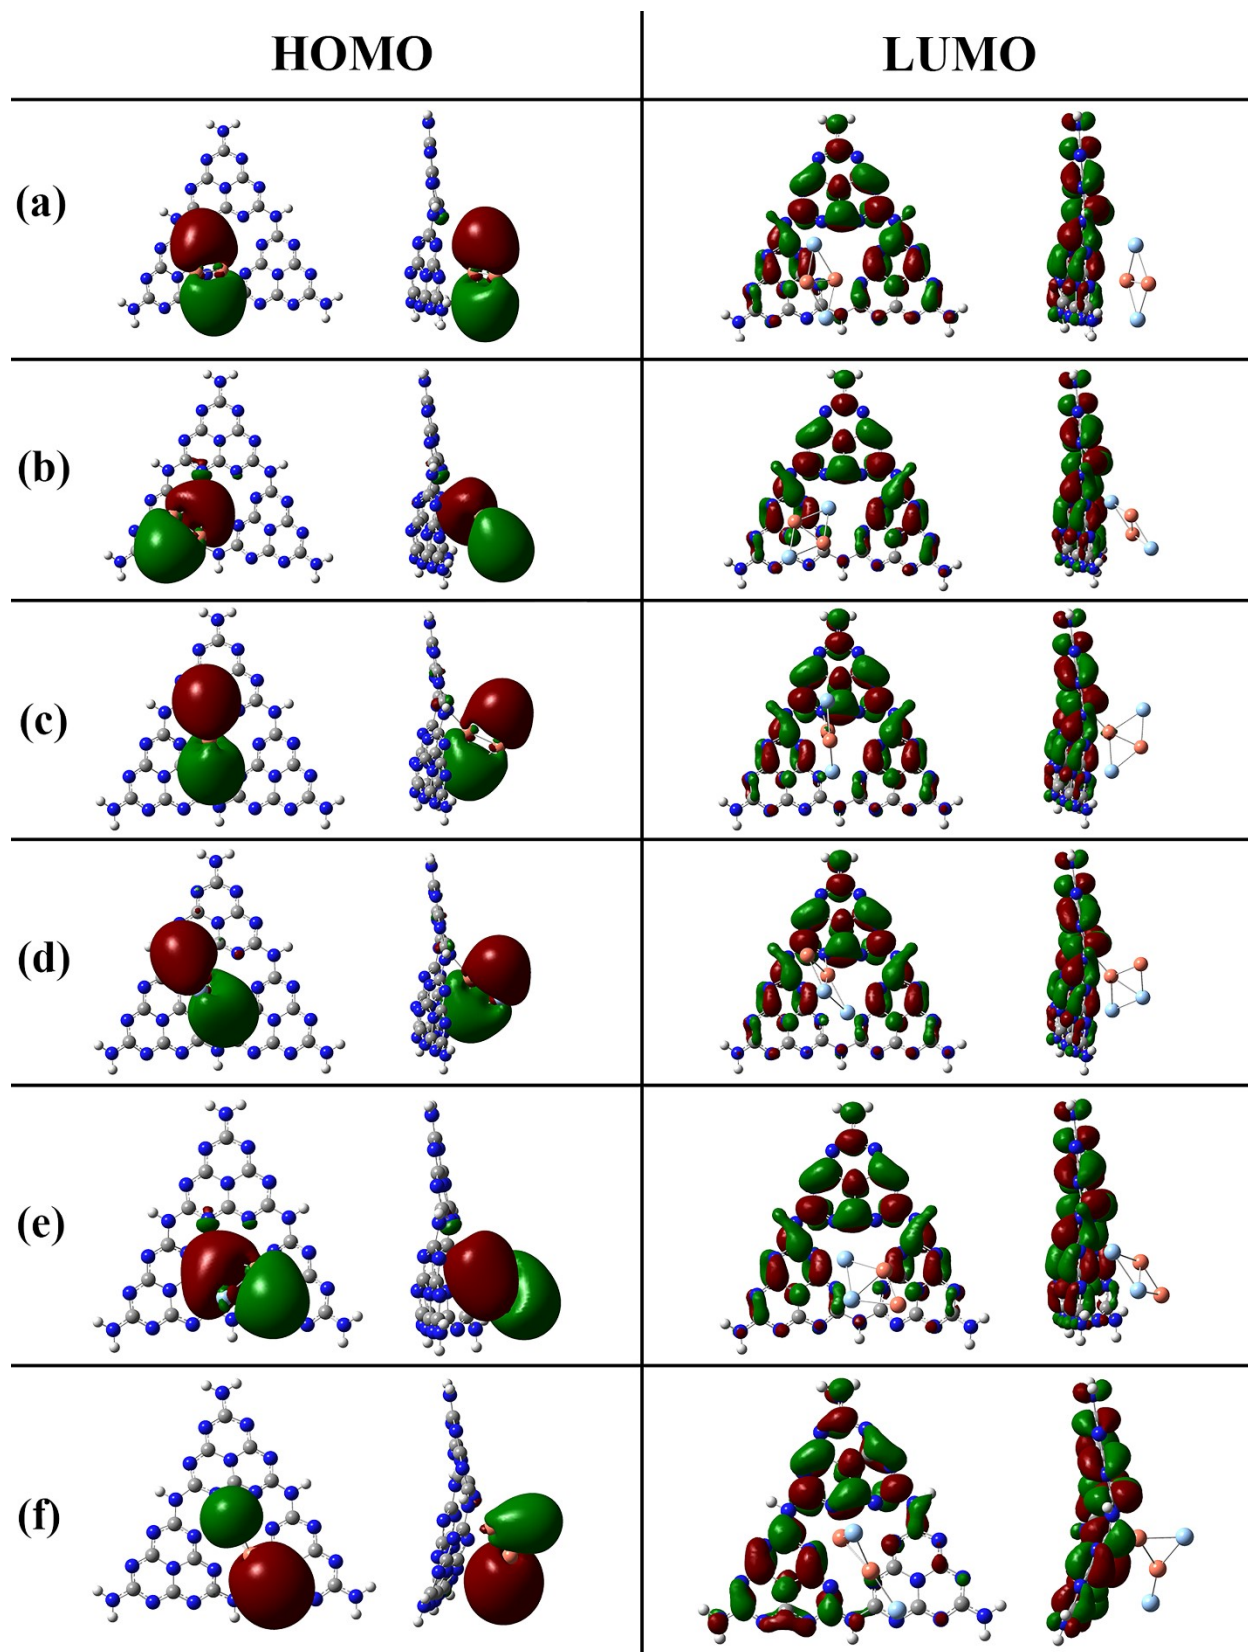

Fig. S18. Two views of the HOMO and LUMO for six optimized  $\text{Ag}_2\text{-Cu}_2/\text{g-C}_3\text{N}_4$  complexes.

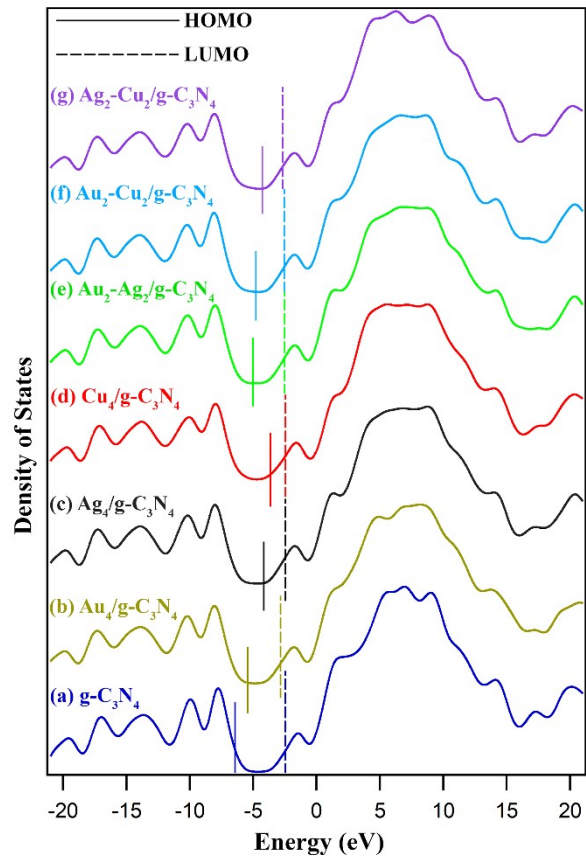

**Fig. S19.** The comparison of the (a) TDOS diagram for the bare  $g\text{-C}_3\text{N}_4$  and the PDOS diagrams for (b)  $\text{Au}_4$ , (c)  $\text{Ag}_4$ , (d)  $\text{Cu}_4$ , (e)  $\text{Au}_2\text{-Ag}_2$ , (f)  $\text{Au}_2\text{-Cu}_2$ , and (g)  $\text{Ag}_2\text{-Cu}_2/g\text{-C}_3\text{N}_4$  complexes (the  $g\text{-C}_3\text{N}_4$  fragment).



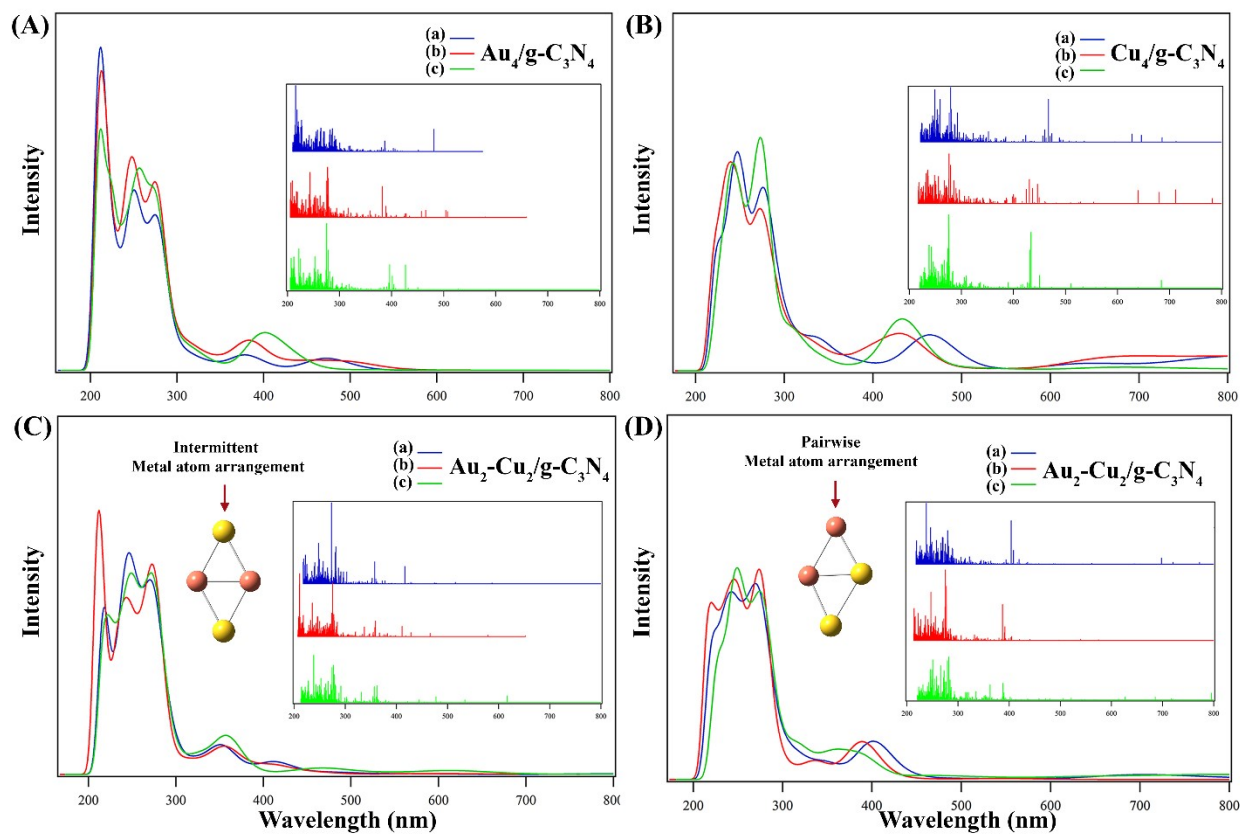

**Fig. S20.** The UV spectra of: (A) Au<sub>4</sub>/g-C<sub>3</sub>N<sub>4</sub>, (B) Cu<sub>4</sub>/g-C<sub>3</sub>N<sub>4</sub>, (C) and (D) Au<sub>2</sub>-Cu<sub>2</sub>/g-C<sub>3</sub>N<sub>4</sub> with different metal atom arrangements. The interior figures represent the UV absorption lines for each spectrum.

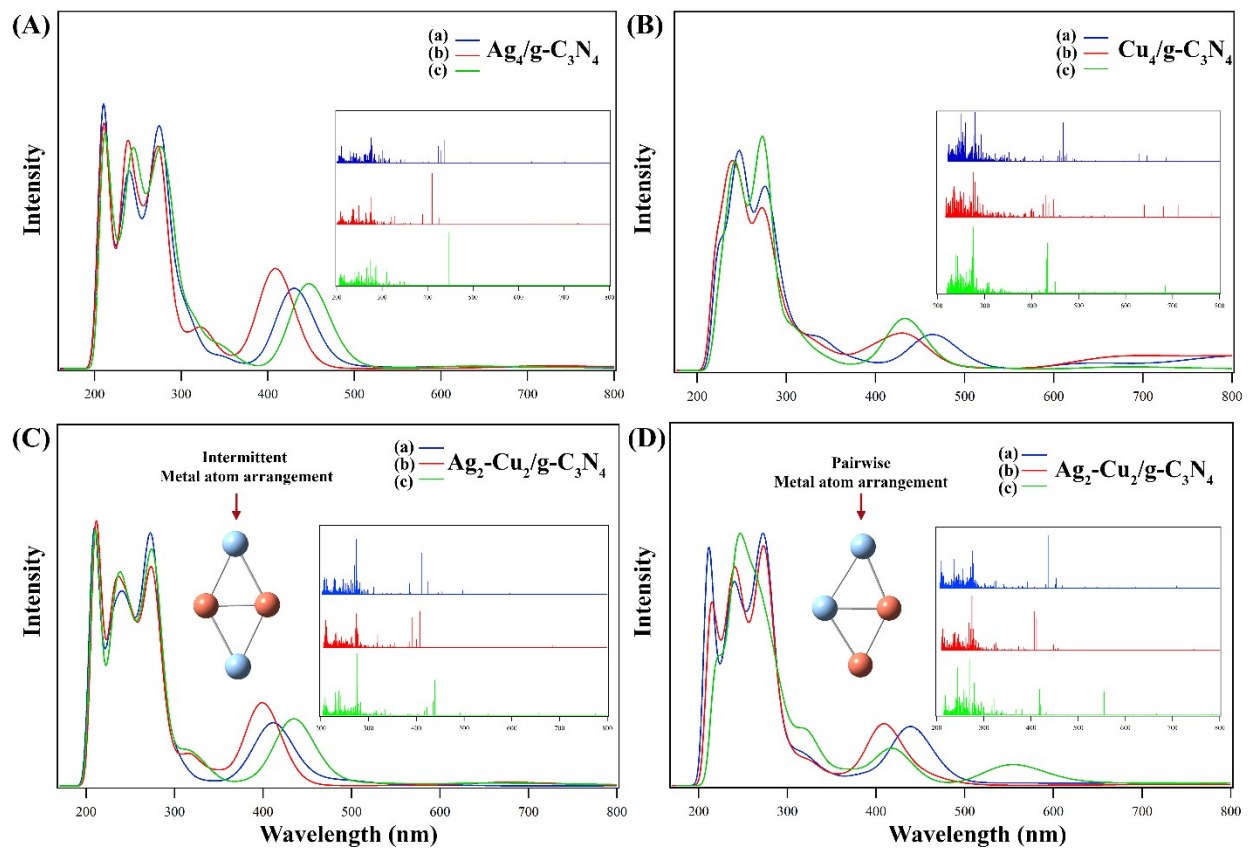

**Fig. S21.** The UV spectra of: (A)  $\text{Ag}_4/\text{g-C}_3\text{N}_4$ , (B)  $\text{Cu}_4/\text{g-C}_3\text{N}_4$ , (C) and (D)  $\text{Ag}_2\text{-Cu}_2/\text{g-C}_3\text{N}_4$  with different metal atom arrangements. The interior figures represent the UV absorption lines for each spectrum.
